# Supplementary material for: Feasibility Study of Soft Tooling Inserts for Injection Molding with Integrated Automated Slides
Source: MDPI journal article supplement (doi:10.3390/mi12070730), 2021-06-22
Supplement: s1 [file s1]

# Ejector mold

Measured with digital caliper:

| nominal     | measurement |          |          |
|-------------|-------------|----------|----------|
|             | left        | center   | right    |
| 23.00/31.00 | 23.12       | 31.22    | 23.13    |
| deviation   | + 0.52 %    | + 0.71 % | + 0.57 % |
| 80.00       | 80.04       | 79.93    | 79.99    |
| deviation   | + 0,05 %    | - 0,09 % | - 0,01 % |
|             | top         | center   | bottom   |
| 179.50      | 179.10      | 179.10   | 179.16   |
| deviation   | - 0.22 %    | - 0.22 % | - 0.19 % |

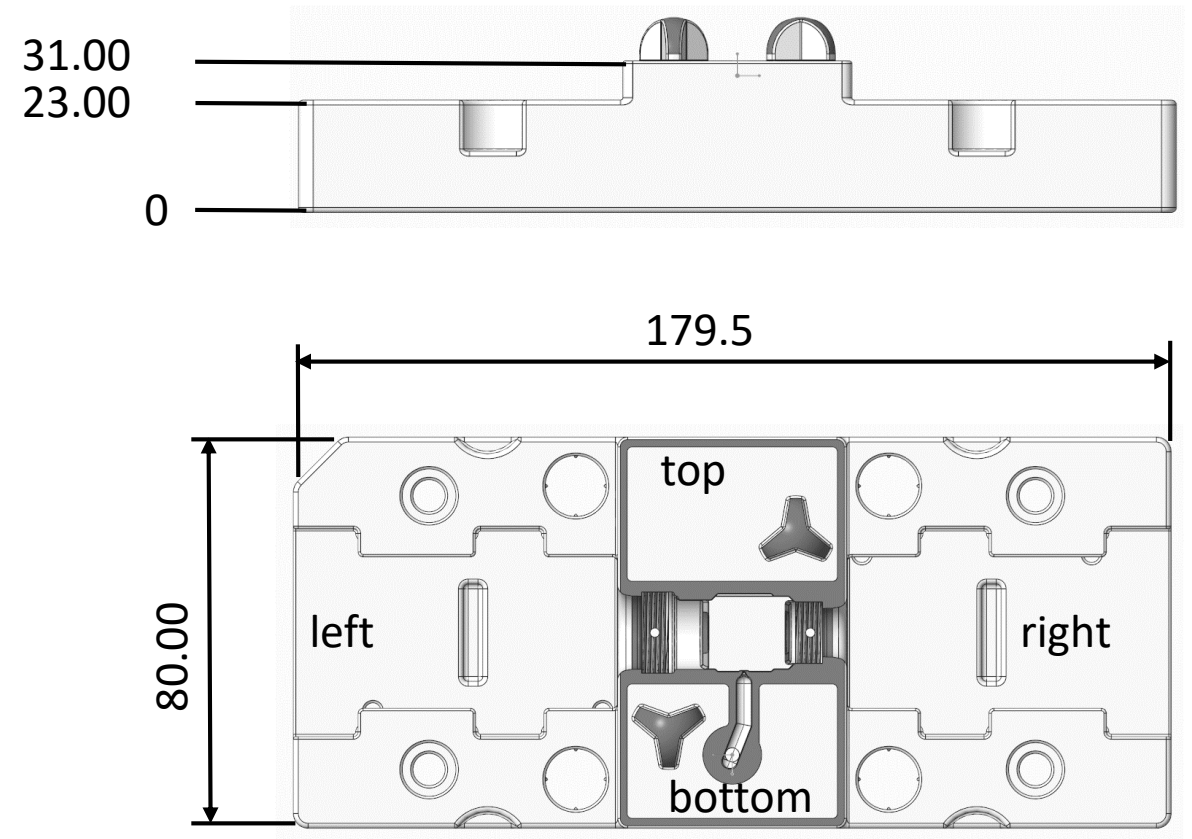

# Injection mold

Measured with digital caliper:

| nominal   | measurement |          |          |
|-----------|-------------|----------|----------|
|           | left        | center   | right    |
| 25.00     | 25.10       | 25.16    | 25.09    |
| deviation | + 0,40 %    | + 0,64 % | + 0,36 % |
| 80.00     | 79.93       | 79.93    | 79.95    |
| deviation | - 0,09 %    | - 0,09 % | - 0,06 % |
|           | top         | center   | bottom   |
| 179.50    | 179.04      | 179.04   | 179.05   |
| deviation | - 0,26 %    | - 0,26 % | - 0,25 % |

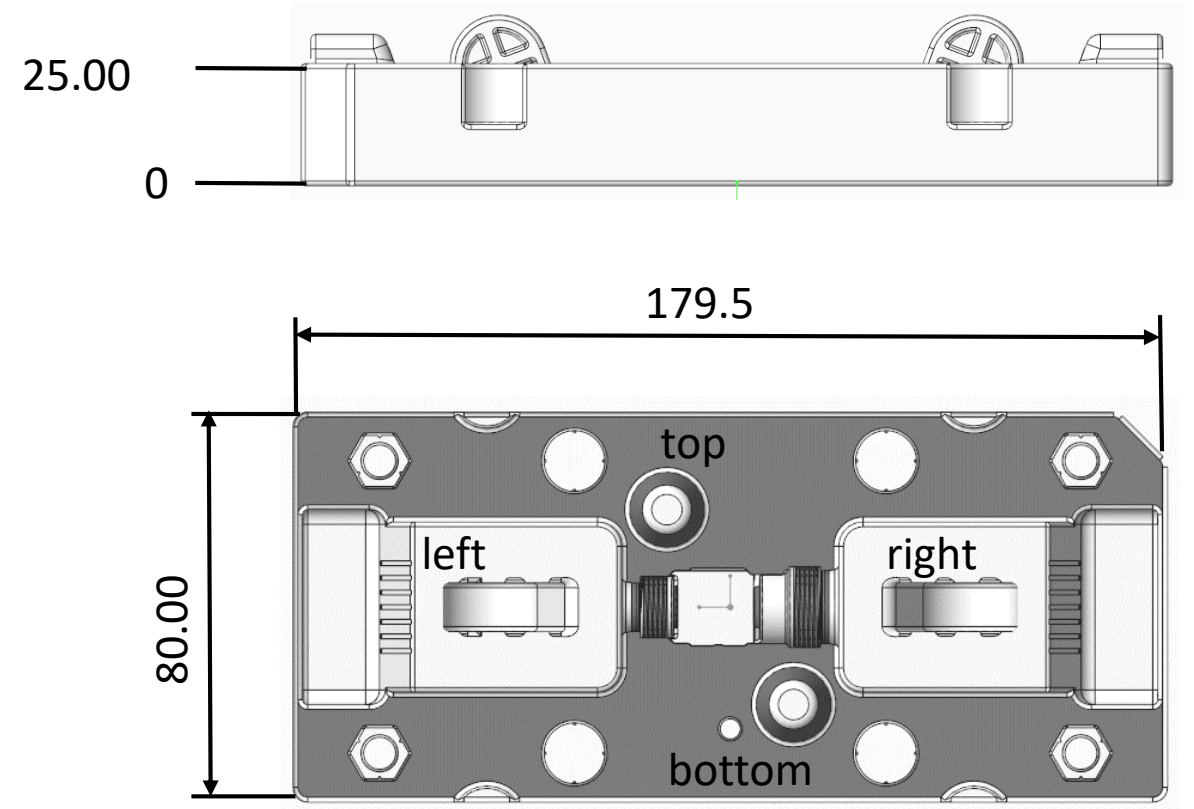

# Slider M18 side

Measured with digital caliper:

| nominal   | measurement |          |
|-----------|-------------|----------|
| 30.50     | 30.51       |          |
| deviation | + 0.03 %    |          |
| 50.00     | 50.20       |          |
| deviation | + 0.40 %    |          |
|           | front       | back     |
| 38.00     | 37.83       | 37.92    |
| deviation | - 0.45 %    | - 0.21 % |

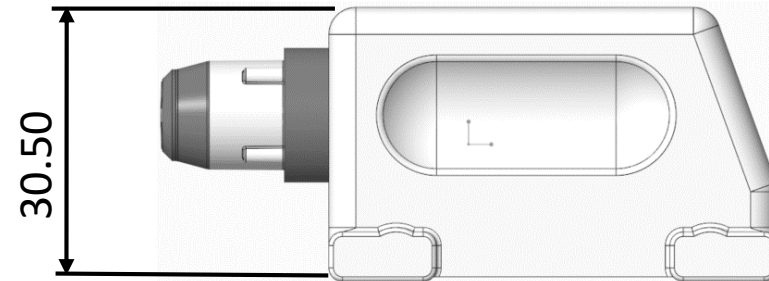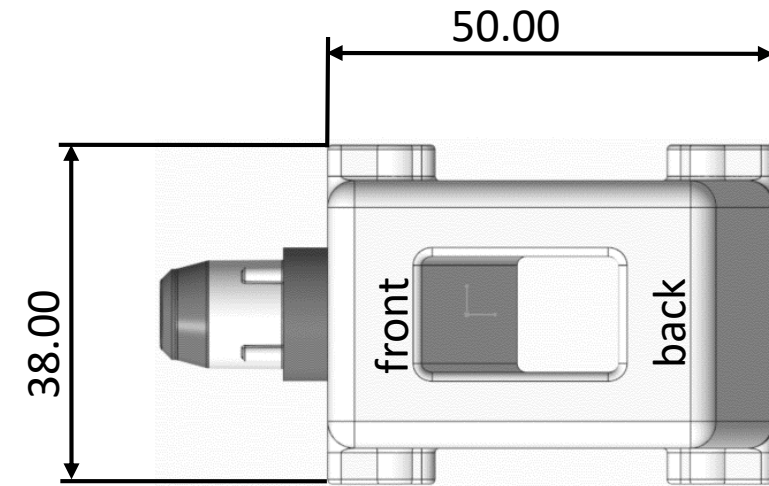

# Slider M14 side

Measured with digital caliper:

| nominal   | measurement |          |
|-----------|-------------|----------|
| 30.50     | 30.51       |          |
| deviation | + 0.03 %    |          |
| 50.00     | 50.02       |          |
| deviation | + 0.04 %    |          |
|           | front       | back     |
| 38.00     | 37.82       | 37.89    |
| deviation | - 0.47 %    | - 0.28 % |

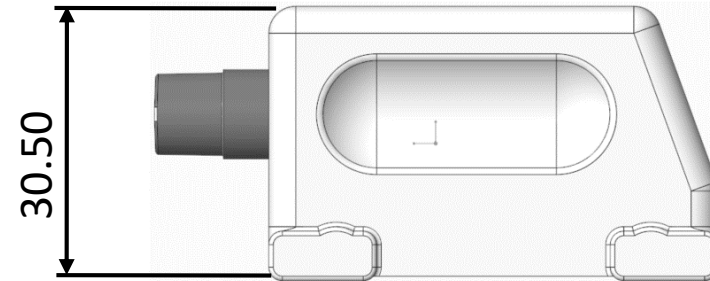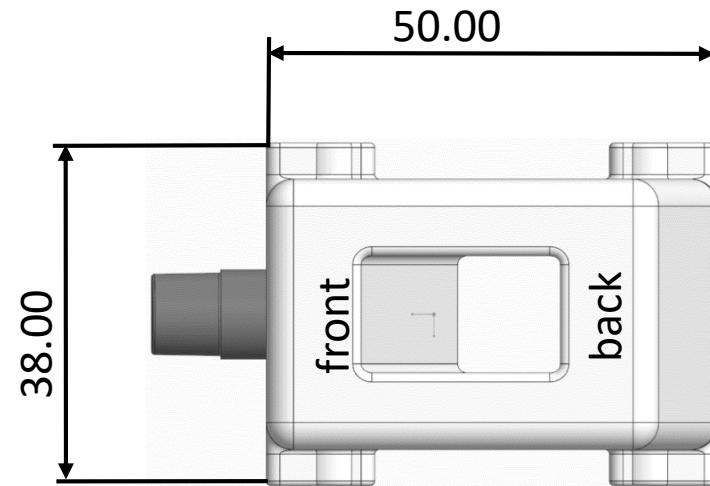

# ejector mold

Measured with dial gauge:

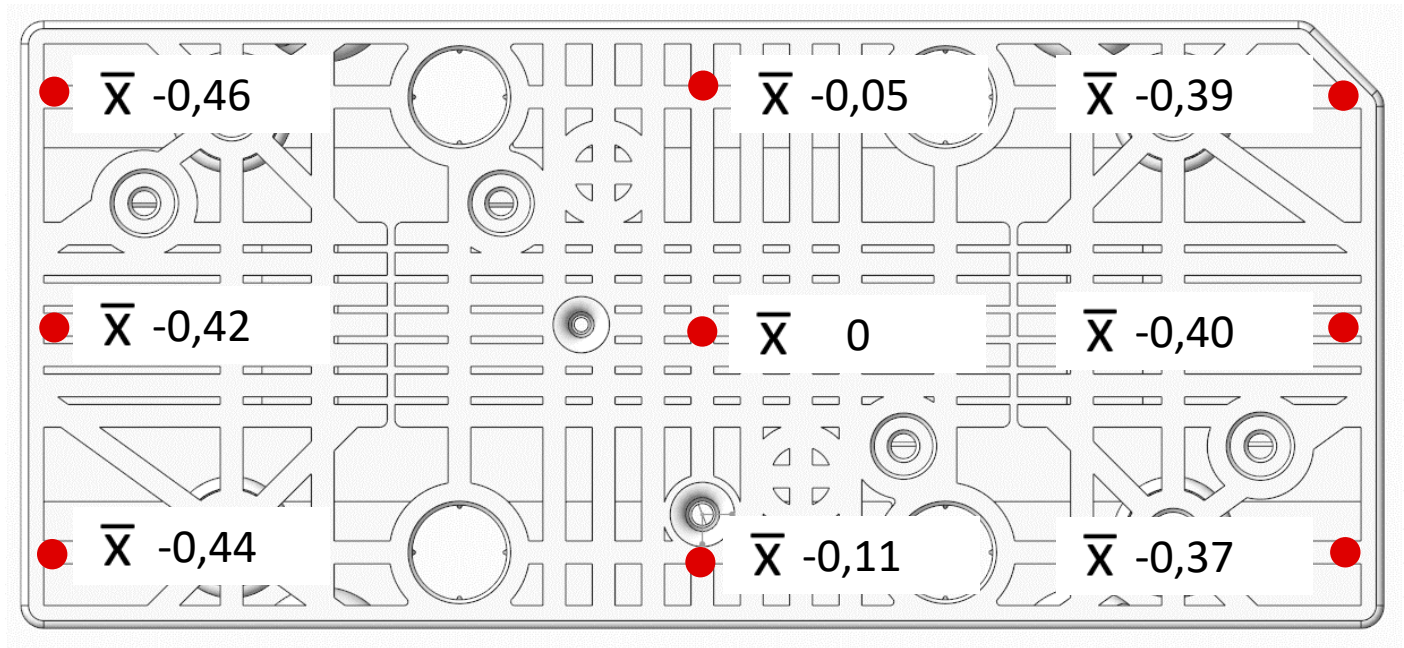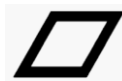

determined evenness  $\approx$  0,46

# injection mold

Measured with dial gauge:

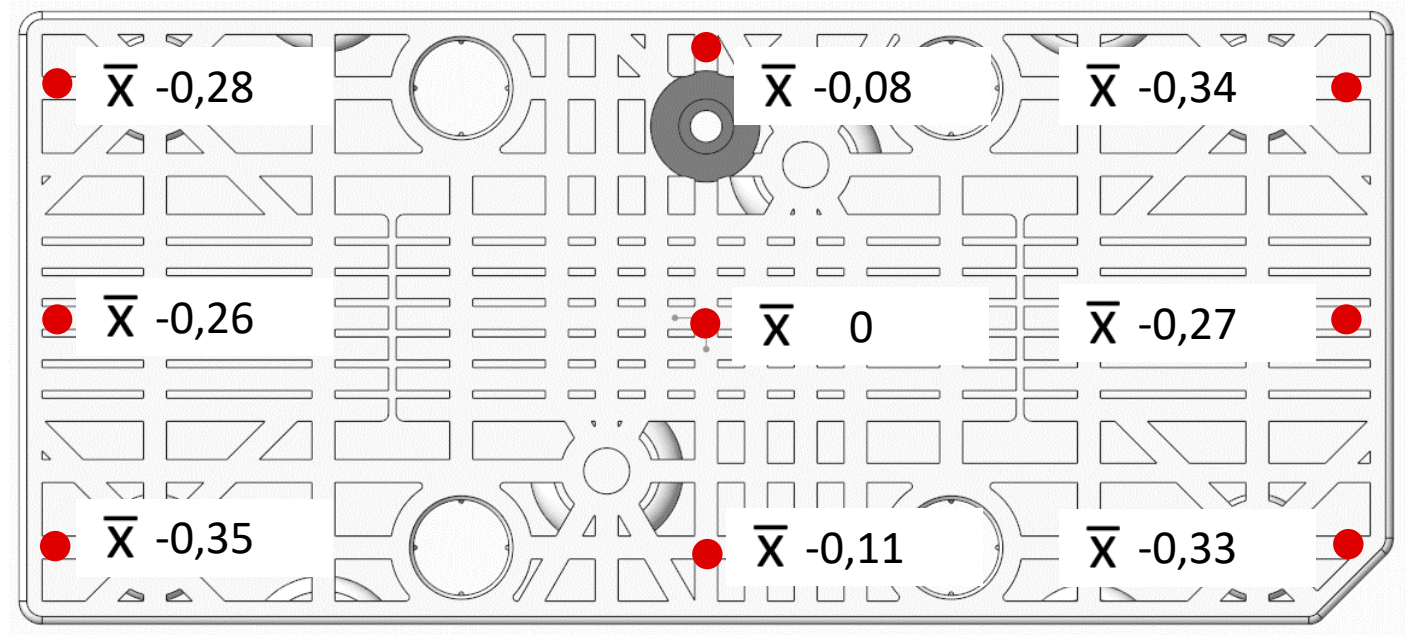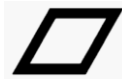

Determined evenness  $\approx$  0,35
